# Supplementary material
Source: bioRxiv or medRxiv preprint supplement (https://www.biorxiv.org/highwire/filestream/132118/field_highwire_adjunct_files/1/440412-2.pdf)
Supplement: Supplementary file [file 440412-2.pdf]

**Supplementary table 1.** Age and sex distribution of the matched MS and HC samples at time point 3, including the predicted brain age and brain age gaps for global BAG estimates.

| <b>Cross validation of Brain Age Prediction</b> | <b>Time point 3 1.5T (n=58)</b> | <b>Time point 3 3T (n=58)</b> | <b>Healthy controls 3T (n=235)</b> |
|-------------------------------------------------|---------------------------------|-------------------------------|------------------------------------|
| Age (SD, min-max)                               | 40.8 (7.3, 25-53)               | 40.7 (7.3, 25-53)             | 40.8 (7.6, 26-53)                  |
| Female (%)                                      | 72 %                            | 72 %                          | 72 %                               |
| Predicted brain age (SD)                        | 45.9 (11.3)                     | 55.6 (7.8)                    | 51.2 (8.2)                         |
| Predicted brain age gap (SD)                    | 5.2 (9.3)                       | 14.9 (7.0)                    | 10.4 (7.2)                         |

**Supplementary table 2.** Listed are the differences in global brain age estimates and their correlation between the 1.5T and 3T MRI scanner. The data is based on time point 3 and 58 MS patients. All brain age gap estimates are residualized for age, age<sup>2</sup> and sex.

**1.5T vs 3T scanner differences for MS patients at time point 3**

| <i>Brain Region</i>      | <i>BAG difference 1.5T vs 3T</i> | <i>Correlation</i> |
|--------------------------|----------------------------------|--------------------|
| Full brain               | 9.69                             | 0.78               |
| Occipital                | 3.34                             | 0.68               |
| Temporal                 | 10.20                            | 0.67               |
| Frontal                  | 10.60                            | 0.74               |
| Parietal                 | 9.21                             | 0.72               |
| Cingulate                | -6.08                            | 0.74               |
| Insula                   | -0.43                            | 0.71               |
| Subcortical / Cerebellar | -3.54                            | 0.86               |

**Supplementary table 3.** Differences between the MS and HC samples across all time points, including 3T at time point 3. Brain age gaps (BAG) are residualized for age, age<sup>2</sup>, sex and scanner. Effect sizes were made using Cohen's D estimates. HC sample and MS sample matched on age and sex based on available MS patients with 3T scan performed at time point 3.

| Case control: HC (n=235) vs MS<br>Brain age gaps residualized for age, age <sup>2</sup> , sex and scanner | 1.5 T               |       |                        |           |                     |      |                        |           |                     |     |                        |           | 3 T                 |      |                        |           |
|-----------------------------------------------------------------------------------------------------------|---------------------|-------|------------------------|-----------|---------------------|------|------------------------|-----------|---------------------|-----|------------------------|-----------|---------------------|------|------------------------|-----------|
|                                                                                                           | Time point 1 (n=73) |       |                        |           | Time point 2 (n=58) |      |                        |           | Time point 3 (n=60) |     |                        |           | Time point 3 (n=58) |      |                        |           |
|                                                                                                           | BAG                 | t     | p                      | Cohen's D | BAG                 | t    | p                      | Cohen's D | BAG                 | t   | p                      | Cohen's D | BAG                 | t    | p                      | Cohen's D |
| Brain regions                                                                                             |                     |       |                        |           |                     |      |                        |           |                     |     |                        |           |                     |      |                        |           |
| Full brain                                                                                                | 2.8                 | 3.1   | 1.8 x 10 <sup>-3</sup> | 0.40      | 3.3                 | 3.4  | 8.0 x 10 <sup>-4</sup> | 0.48      | 4.6                 | 4.5 | 1.1 x 10 <sup>-5</sup> | 0.64      | 4.4                 | 4.7  | 4.0 x 10 <sup>-6</sup> | 0.69      |
| Occipital                                                                                                 | 4.3                 | 3.5   | 6.0 x 10 <sup>-4</sup> | 0.47      | 4.0                 | 2.9  | 3.5 x 10 <sup>-3</sup> | 0.44      | 4.7                 | 3.5 | 5.9 x 10 <sup>-4</sup> | 0.51      | 4.3                 | 3.2  | 1.4 x 10 <sup>-3</sup> | 0.48      |
| Temporal                                                                                                  | -0.32               | -0.02 | 0.99                   | -0.04     | 0.02                | 0.13 | 0.90                   | 0.00      | 0.63                | 0.5 | 0.62                   | 0.07      | 0.15                | 0.19 | 0.90                   | 0.02      |
| Frontal                                                                                                   | 1.7                 | 1.7   | 0.09                   | 0.21      | 2.4                 | 2.0  | 0.048                  | 0.28      | 3.3                 | 2.7 | 7.5 x 10 <sup>-3</sup> | 0.39      | 2.9                 | 2.4  | 0.019                  | 0.35      |
| Parietal                                                                                                  | 0.4                 | 0.8   | 0.45                   | 0.06      | 0.9                 | 1.1  | 0.28                   | 0.13      | 3.0                 | 2.9 | 3.5 x 10 <sup>-3</sup> | 0.42      | 2.4                 | 2.6  | 9.8 x 10 <sup>-3</sup> | 0.38      |
| Cingulate                                                                                                 | 4.5                 | 3.4   | 8.2 x 10 <sup>-4</sup> | 0.43      | 4.0                 | 2.8  | 5.9 x 10 <sup>-4</sup> | 0.38      | 5.5                 | 3.6 | 3.9 x 10 <sup>-4</sup> | 0.52      | 5.1                 | 3.2  | 1.3 x 10 <sup>-3</sup> | 0.48      |
| Insula                                                                                                    | 4.0                 | 3.1   | 2.2 x 10 <sup>-3</sup> | 0.42      | 4.0                 | 2.8  | 5.6 x 10 <sup>-3</sup> | 0.42      | 4.8                 | 3.5 | 6.1 x 10 <sup>-4</sup> | 0.51      | 4.3                 | 3.0  | 2.6 x 10 <sup>-3</sup> | 0.45      |
| Cerebellar / Subcortical                                                                                  | 5.7                 | 4.7   | 4.8 x 10 <sup>-6</sup> | 0.63      | 6.5                 | 4.9  | 1.9 x 10 <sup>-6</sup> | 0.71      | 6.0                 | 4.6 | 6.5 x 10 <sup>-6</sup> | 0.66      | 6.2                 | 4.9  | 1.6 x 10 <sup>-6</sup> | 0.72      |

**Supplementary table 4.** Summary of predicted brain age data for global BAG in the longitudinal MS cohort. Brain age gaps were residualized for age, age<sup>2</sup>, sex and scanner.

**Longitudinal MS Cohort**

| <i>Time point 1</i>                                |              |
|----------------------------------------------------|--------------|
| Available MRI samples                              | <i>n</i> =73 |
| Age, mean (SD)                                     | 35.3 (7.3)   |
| Brain age gap, mean (SD)                           | 5.5 (8.3)    |
| Residualized brain age gap, mean (SD)              | 2.8 (9.0)    |
| <i>Time point 2</i>                                |              |
| Available MRI samples                              | <i>n</i> =58 |
| Age, mean (SD)                                     | 36.2 (7.2)   |
| Predicted brain age gap, mean (SD)                 | 5.7 (9.2)    |
| Residualized brain age gap, mean (SD)              | 3.3 (9.4)    |
| <i>Time point 3</i>                                |              |
| Available MRI samples                              | <i>n</i> =60 |
| Age, mean (SD)                                     | 40.5 (7.3)   |
| Predicted brain age gap, mean (SD)                 | 5.4 (9.4)    |
| Residualized brain age gap, mean (SD)              | 4.6 (9.8)    |
| <i>Rate of annual brain aging</i>                  |              |
| Available samples                                  | <i>n</i> =68 |
| Annual rate of brain aging, mean (SD)              | 0.02 (1.22)  |
| Residualized annual rate of brain aging, mean (SD) | 0.41 (1.23)  |

**Supplementary table 5.** Summary of the longitudinal brain aging in the longitudinal MS cohort. To calculate the One-sample t Test we used SPSS and used 0 as the test value compared to the annualized brain aging of the different brain regions

| <b>Longitudinal MRI data (n=68)</b> |                                                 | <b>One-sample t Test</b> |              |
|-------------------------------------|-------------------------------------------------|--------------------------|--------------|
| <i>Brain regions</i>                | <i>Rate of annual brain aging (years, (SD))</i> | <i>t</i>                 | <i>p</i>     |
| Full brain                          | <b>0.41 (1.23)</b>                              | <b>2.76</b>              | <b>0.008</b> |
| Occipital                           | -0.16 (1.38)                                    | -0.95                    | 0.35         |
| Temporal                            | -0.09 (1.41)                                    | -0.53                    | 0.60         |
| Frontal                             | 0.36 (1.72)                                     | 1.73                     | 0.09         |
| Parietal                            | 0.37 (1.59)                                     | 1.90                     | 0.06         |
| Cingulate                           | -0.07 (2.62)                                    | -0.22                    | 0.83         |
| Insula                              | 0.12 (2.02)                                     | 0.48                     | 0.63         |
| Cerebellar / Subcortical            | 0.35 (1.71)                                     | 1.71                     | 0.09         |

**Supplementary table 6.** The global brain age gaps and correlation between the MRI data from the three processing steps at time point 1. We also listed the correlataions between chronological age and brain age gaps in the same three groups.

| <b>Effect of MRI postprocessing from time point 1</b> | <b>Raw images</b> | <b>Lesion filling</b> | <b>Longitudinal stream</b> |
|-------------------------------------------------------|-------------------|-----------------------|----------------------------|
| Brain age gap (SD)                                    | 10.4 (8.7)        | 10.6 (8.9)            | 5.5 (8.3)                  |
| Residualized brain age gap, mean (SD)                 | 2.5 (8.6)         | 2.7 (8.8)             | -2.4 (8.1)                 |
| Correlation with chronological age, r                 | 0.58              | 0.56                  | 0.59                       |
| Correlation with raw images, r                        | -                 | 0.98                  | 0.96                       |
| Correlation with lesion filling, r                    | 0.98              | -                     | 0.95                       |
| Correlation with FreeSurfer longitudinal stream, r    | 0.96              | 0.95                  | -                          |

**Supplementary table 7.** Differences between the MS and HC samples across the three different processing steps at time point 1. Global brain age gaps (BAG) are residualized for age, age<sup>2</sup>, sex and scanner. Effect sizes were made using Cohen's D estimates. HC sample and MS sample matched on age and sex based on available MS patients with 3T scan performed at time point 3.

| Case control: HC (n=235) vs MS (n=73)<br>Brain age gaps residualized for age, age <sup>2</sup> , sex and scanner | 1.5 T                                  |       |                        |           |                       |     |                         |           |                    |     |                         |           |
|------------------------------------------------------------------------------------------------------------------|----------------------------------------|-------|------------------------|-----------|-----------------------|-----|-------------------------|-----------|--------------------|-----|-------------------------|-----------|
|                                                                                                                  | Time point 1 - Longitudinal Freesurfer |       |                        |           | Time point 1 - Filled |     |                         |           | Time point 1 - Raw |     |                         |           |
|                                                                                                                  | BAG                                    | t     | p                      | Cohen's D | BAG                   | t   | p                       | Cohen's D | BAG                | t   | p                       | Cohen's D |
| Brain regions                                                                                                    |                                        |       |                        |           |                       |     |                         |           |                    |     |                         |           |
| Full brain                                                                                                       | 2.8                                    | 3.1   | 1.8 x 10 <sup>-3</sup> | 0.40      | 7.9                   | 8.3 | 3.3 x 10 <sup>-15</sup> | 1.11      | 7.7                | 8.1 | 1.4 x 10 <sup>-14</sup> | 1.09      |
| Occipital                                                                                                        | 4.3                                    | 3.5   | 6.0 x 10 <sup>-4</sup> | 0.47      | 7.6                   | 6.2 | 2.2 x 10 <sup>-9</sup>  | 0.82      | 8.2                | 6.4 | 4.4 x 10 <sup>-10</sup> | 0.88      |
| Temporal                                                                                                         | -0.32                                  | -0.02 | 0.99                   | -0.04     | 4.7                   | 4.3 | 2.0 x 10 <sup>-5</sup>  | 0.62      | 5.1                | 4.7 | 2.2 x 10 <sup>-5</sup>  | 0.57      |
| Frontal                                                                                                          | 1.7                                    | 1.7   | 0.09                   | 0.21      | 6.8                   | 6.0 | 4.8 x 10 <sup>-9</sup>  | 0.80      | 7.2                | 6.9 | 1.7 x 10 <sup>-9</sup>  | 0.84      |
| Parietal                                                                                                         | 0.4                                    | 0.8   | 0.45                   | 0.06      | 6.1                   | 6.2 | 1.6 x 10 <sup>-9</sup>  | 0.82      | 6.6                | 6.2 | 2.4 x 10 <sup>-10</sup> | 0.87      |
| Cingulate                                                                                                        | 4.5                                    | 3.4   | 8.2 x 10 <sup>-4</sup> | 0.43      | 12.0                  | 8.7 | 2.8 x 10 <sup>-16</sup> | 1.15      | 11.9               | 8.4 | 2.1 x 10 <sup>-15</sup> | 1.13      |
| Insula                                                                                                           | 4.0                                    | 3.1   | 2.2 x 10 <sup>-3</sup> | 0.42      | 5.9                   | 4.4 | 1.8 x 10 <sup>-5</sup>  | 0.61      | 5.5                | 5.6 | 6.4 x 10 <sup>-5</sup>  | 0.58      |
| Cerebellar / Subcortical                                                                                         | 5.7                                    | 4.7   | 4.8 x 10 <sup>-6</sup> | 0.63      | 8.7                   | 7.3 | 2.0 x 10 <sup>-12</sup> | 1.01      | 8.5                | 8.3 | 2.7 x 10 <sup>-11</sup> | 0.95      |

**Supplementary table 8.** An overview of the intraclass correlation coefficient (ICC), to show reliability between the brain age measures from the different time points, for all global and region wise brain age predictions before and after residualization for age, age2, sex and scanner.

| Predicted Age                           | Time point 1 vs. time point 2 (n=56 patients) | Time point 2 vs. time point 3 (n=49 patients) | Time point 1 vs. time point 3 (n=57 patients) | All time points(n=47 patients) |
|-----------------------------------------|-----------------------------------------------|-----------------------------------------------|-----------------------------------------------|--------------------------------|
| <b>Brain regions</b>                    |                                               |                                               |                                               |                                |
| Full brain - ICC (95% CI)               | 0.96 (0.94-0.98)                              | 0.87 (0.79-0.93)                              | 0.83 (0.73-0.90)                              | 0.89 (0.83-0.93)               |
| Occipital - ICC (95% CI)                | 0.92 (0.86-0.95)                              | 0.79 (0.66-0.88)                              | 0.85 (0.76-0.91)                              | 0.84 (0.75-0.90)               |
| Temporal - ICC (95% CI)                 | 0.93 (0.88-0.96)                              | 0.86 (0.76-0.92)                              | 0.87 (0.79-0.92)                              | 0.88 (0.82-0.93)               |
| Frontal - ICC (95% CI)                  | 0.89 (0.81-0.93)                              | 0.83 (0.71-0.90)                              | 0.80 (0.68-0.88)                              | 0.83 (0.74-0.89)               |
| Parietal - ICC (95% CI)                 | 0.91 (0.86-0.95)                              | 0.76 (0.61-0.86)                              | 0.76 (0.63-0.85)                              | 0.79 (0.69-0.87)               |
| Cingulate - ICC (95% CI)                | 0.89 (0.82-0.94)                              | 0.78 (0.65-0.87)                              | 0.77 (0.64-0.86)                              | 0.83 (0.74-0.90)               |
| Insula - ICC (95% CI)                   | 0.89 (0.82-0.94)                              | 0.76 (0.61-0.86)                              | 0.80 (0.68-0.88)                              | 0.82 (0.72-0.89)               |
| Cerebellar / Subcortical - ICC (95% CI) | 0.97 (0.96-0.99)                              | 0.93 (0.88-0.96)                              | 0.91 (0.85-0.94)                              | 0.94 (0.91-0.97)               |
| <b>Residualized brain age gap</b>       |                                               |                                               |                                               |                                |
| Full brain - ICC (95% CI)               | 0.94 (0.90-0.96)                              | 0.83 (0.72-0.90)                              | 0.88 (0.8-0.93)                               | 0.87 (0.81-0.92)               |
| Occipital - ICC (95% CI)                | 0.92 (0.86-0.95)                              | 0.79 (0.66-0.88)                              | 0.87 (0.79-0.92)                              | 0.84 (0.76-0.90)               |
| Temporal - ICC (95% CI)                 | 0.92 (0.86-0.95)                              | 0.85 (0.75-0.91)                              | 0.90 (0.83-0.94)                              | 0.89 (0.82-0.93)               |
| Frontal - ICC (95% CI)                  | 0.87 (0.79-0.92)                              | 0.82 (0.70-0.89)                              | 0.84 (0.74-0.90)                              | 0.84 (0.76-0.90)               |
| Parietal - ICC (95% CI)                 | 0.89 (0.83-0.94)                              | 0.73 (0.57-0.84)                              | 0.78 (0.65-0.86)                              | 0.78 (0.67-0.86)               |
| Cingulate - ICC (95% CI)                | 0.87 (0.79-0.92)                              | 0.79 (0.66-0.88)                              | 0.79 (0.66-0.87)                              | 0.83 (0.75-0.90)               |
| Insula - ICC (95% CI)                   | 0.88 (0.81-0.93)                              | 0.75 (0.60-0.85)                              | 0.82 (0.72-0.89)                              | 0.83 (0.75-0.90)               |
| Cerebellar / Subcortical - ICC (95% CI) | 0.98 (0.96-0.99)                              | 0.93 (0.88-0.96)                              | 0.92 (0.87-0.95)                              | 0.95 (0.92-0.97)               |

**Supplementary table 9.** Pearson's correlations between annualized brain aging and relevant clinical and MRI variables. Significant associations are highlighted with bold (p<0.05). Associations which were still significant after adjusting for false discovery rate are highlighted in red. Abbreviations: Expanded Disability Status Scale (EDSS), Multiple Sclerosis Severity Score (MSSS), Timed 25 Feet Walk Test (T25FWT), Nine hole peg test (9HPT), Disease-modifying therapies (DMT), Fatigue Severity Score (FSS), Beck Depression Index (BDI), Oligoclonal Bands (OBC), No Evidence of Disease Activity (NEDA), White Matter Lesion Load (WMLL) and Intracranial Volume (ICV).

| Pearson's correlations with annual rate of brain aging on time point 3 |              |                               |              |                              |              |                               |              |                               |              |                               |              |                              |              |                              |                 |                              |
|------------------------------------------------------------------------|--------------|-------------------------------|--------------|------------------------------|--------------|-------------------------------|--------------|-------------------------------|--------------|-------------------------------|--------------|------------------------------|--------------|------------------------------|-----------------|------------------------------|
| Clinical variables                                                     | Full brain   |                               | Occipital    |                              | Temporal     |                               | Frontal      |                               | Parietal     |                               | Cingulate    |                              | Insula       |                              | Cereb./Subcort. |                              |
|                                                                        | cor          | p                             | cor          | p                            | cor          | p                             | cor          | p                             | cor          | p                             | cor          | p                            | cor          | p                            | cor             | p                            |
| EDSS                                                                   | 0.09         | 0.49                          | <b>-0.27</b> | <b>0.034</b>                 | -0.02        | 0.88                          | -0.01        | 0.95                          | -0.15        | 0.25                          | <b>-0.28</b> | <b>0.028</b>                 | -0.17        | 0.18                         | 0.22            | 0.08                         |
| Change in EDSS                                                         | 0.16         | 0.23                          | -0.15        | 0.26                         | -0.01        | 0.94                          | 0.09         | 0.50                          | -0.03        | 0.83                          | -0.19        | 0.14                         | -0.13        | 0.34                         | <b>0.29</b>     | <b>0.026</b>                 |
| MSSS                                                                   | -0.03        | 0.84                          | -0.24        | 0.06                         | -0.18        | 0.17                          | -0.09        | 0.47                          | -0.21        | 0.11                          | <b>-0.32</b> | <b>0.011</b>                 | -0.19        | 0.14                         | 0.17            | 0.20                         |
| Change in MSSS                                                         | 0.17         | 0.21                          | -0.04        | 0.75                         | -0.01        | 0.94                          | 0.10         | 0.46                          | 0.05         | 0.68                          | -0.11        | 0.39                         | -0.05        | 0.70                         | <b>0.36</b>     | <b>5.1 x 10<sup>-3</sup></b> |
| T25FWT                                                                 | 0.06         | 0.63                          | -0.13        | 0.33                         | 0.08         | 0.56                          | 0.06         | 0.66                          | -0.01        | 0.95                          | -0.12        | 0.36                         | -0.01        | 0.92                         | 0.01            | 0.96                         |
| Change in T25FWT                                                       | -0.03        | 0.85                          | -0.09        | 0.50                         | 0.01         | 0.96                          | -0.01        | 0.97                          | 0.02         | 0.86                          | -0.21        | 0.11                         | 0.02         | 0.86                         | 0.08            | 0.56                         |
| 9HPT Dominant                                                          | 0.11         | 0.40                          | -0.09        | 0.47                         | 0.01         | 0.92                          | 0.02         | 0.91                          | -0.15        | 0.25                          | -0.23        | 0.07                         | -0.08        | 0.56                         | 0.06            | 0.64                         |
| Change in 9HPT Dominant                                                | 0.11         | 0.38                          | -0.07        | 0.62                         | 0.05         | 0.70                          | 0.07         | 0.60                          | -0.10        | 0.45                          | -0.13        | 0.31                         | -0.07        | 0.62                         | 0.00            | 0.99                         |
| 9HPT Non-dominant                                                      | <b>0.29</b>  | <b>0.028</b>                  | -0.06        | 0.66                         | 0.18         | 0.18                          | 0.15         | 0.27                          | 0.01         | 0.92                          | -0.10        | 0.45                         | 0.04         | 0.76                         | <b>0.30</b>     | <b>0.021</b>                 |
| Change in 9HPT Non-dominant                                            | <b>0.31</b>  | <b>0.017</b>                  | 0.00         | 0.98                         | 0.13         | 0.33                          | 0.20         | 0.14                          | 0.08         | 0.53                          | -0.06        | 0.63                         | 0.00         | 0.97                         | <b>0.32</b>     | <b>0.014</b>                 |
| DMT Level                                                              | <b>-0.28</b> | <b>0.031</b>                  | -0.15        | 0.27                         | -0.24        | 0.06                          | -0.22        | 0.09                          | -0.17        | 0.21                          | -0.11        | 0.39                         | -0.13        | 0.31                         | -0.08           | 0.54                         |
| Total attacks                                                          | -0.22        | 0.10                          | <b>-0.26</b> | <b>0.043</b>                 | -0.23        | 0.08                          | -0.12        | 0.35                          | -0.24        | 0.07                          | -0.22        | 0.10                         | <b>-0.27</b> | <b>0.033</b>                 | 0.16            | 0.21                         |
| New attacks                                                            | -0.09        | 0.50                          | -0.14        | 0.30                         | -0.10        | 0.47                          | -0.13        | 0.32                          | -0.11        | 0.41                          | -0.08        | 0.52                         | -0.16        | 0.23                         | 0.03            | 0.83                         |
| OCB status                                                             | -0.16        | 0.20                          | -0.01        | 0.93                         | -0.23        | 0.06                          | -0.02        | 0.87                          | -0.02        | 0.89                          | 0.05         | 0.66                         | -0.06        | 0.62                         | -0.17           | 0.17                         |
| Gender                                                                 | -0.05        | 0.66                          | 0.04         | 0.74                         | -0.08        | 0.54                          | 0.06         | 0.60                          | 0.04         | 0.74                          | 0.02         | 0.90                         | 0.17         | 0.17                         | -0.11           | 0.37                         |
| NEDA-3                                                                 | -0.02        | 0.90                          | -0.08        | 0.56                         | -0.08        | 0.54                          | 0.05         | 0.70                          | -0.06        | 0.66                          | -0.04        | 0.78                         | -0.12        | 0.38                         | 0.11            | 0.40                         |
| NEDA-4                                                                 | 0.06         | 0.65                          | 0.02         | 0.86                         | -0.02        | 0.86                          | 0.12         | 0.37                          | 0.01         | 0.97                          | -0.06        | 0.66                         | 0.00         | 1.00                         | 0.15            | 0.28                         |
| Distance from diagnosis                                                | -0.04        | 0.74                          | -0.15        | 0.25                         | 0.07         | 0.60                          | -0.15        | 0.26                          | -0.05        | 0.68                          | 0.01         | 0.92                         | -0.09        | 0.51                         | 0.00            | 0.98                         |
| Distance from first symptom                                            | -0.06        | 0.66                          | -0.10        | 0.43                         | 0.09         | 0.49                          | -0.09        | 0.50                          | -0.01        | 0.93                          | -0.07        | 0.58                         | -0.11        | 0.39                         | -0.15           | 0.26                         |
| MRI variables                                                          | cor          | p                             | cor          | p                            | cor          | p                             | cor          | p                             | cor          | p                             | cor          | p                            | cor          | p                            | cor             | p                            |
| WMLL                                                                   | <b>0.29</b>  | <b>0.026</b>                  | 0.13         | 0.33                         | <b>0.29</b>  | <b>0.027</b>                  | 0.21         | 0.11                          | 0.19         | 0.16                          | -0.02        | 0.90                         | -0.01        | 0.94                         | 0.01            | 0.96                         |
| Change in WMLL                                                         | <b>0.30</b>  | <b>0.015</b>                  | <b>0.34</b>  | <b>4.9 x 10<sup>-3</sup></b> | <b>0.34</b>  | <b>5.7 x 10<sup>-3</sup></b>  | 0.19         | 0.12                          | <b>0.35</b>  | <b>4.3 x 10<sup>-3</sup></b>  | 0.10         | 0.43                         | 0.14         | 0.27                         | 0.00            | 0.98                         |
| Brain volume                                                           | -0.01        | 0.93                          | -0.02        | 0.89                         | -0.11        | 0.41                          | -0.08        | 0.54                          | -0.03        | 0.83                          | -0.04        | 0.75                         | 0.01         | 0.95                         | 0.10            | 0.44                         |
| Brain atrophy                                                          | <b>-0.79</b> | <b>4.3 x 10<sup>-15</sup></b> | <b>-0.39</b> | <b>1.2 x 10<sup>-3</sup></b> | <b>-0.74</b> | <b>1.6 x 10<sup>-12</sup></b> | <b>-0.79</b> | <b>1.6 x 10<sup>-15</sup></b> | <b>-0.72</b> | <b>1.1 x 10<sup>-11</sup></b> | <b>-0.35</b> | <b>3.9 x 10<sup>-3</sup></b> | <b>-0.65</b> | <b>2.1 x 10<sup>-8</sup></b> | -0.07           | 0.57                         |
| ICV                                                                    | 0.01         | 0.95                          | -0.04        | 0.75                         | -0.05        | 0.71                          | -0.07        | 0.58                          | -0.05        | 0.67                          | 0.04         | 0.73                         | -0.12        | 0.34                         | -0.01           | 0.94                         |



**Supplementary table 10.** Pearson's correlations between brain age gap and relevant clinical and MRI variables. Significant associations are highlighted with bold ( $p < 0.05$ ). Associations which were still significant after adjusting for false discovery rate are highlighted in red. Abbreviations: Expanded Disability Status Scale (EDSS), Multiple Sclerosis Severity Score (MSSS), Timed 25 Feet Walk Test (T25FWT), Nine hole peg test (9HPT), Disease-modifying therapies (DMT), Fatigue Severity Score (FSS), Beck Depression Index (BDI), Oligoclonal Bands (OCB), No Evidence of Disease Activity (NEDA), White Matter Lesion Load (WMLL) and Intracranial Volume (ICV).

**Pearson's correlations with brain age gap on time point 3**

| Clinical variables          | Full brain   |                              | Occipital    |                              | Temporal     |                              | Frontal      |                              | Parietal     |                              | Cingulate    |                              | Insula       |              | Cereb./Subcort. |                              |
|-----------------------------|--------------|------------------------------|--------------|------------------------------|--------------|------------------------------|--------------|------------------------------|--------------|------------------------------|--------------|------------------------------|--------------|--------------|-----------------|------------------------------|
|                             | cor          | p                            | cor          | p                            | cor          | p                            | cor          | p                            | cor          | p                            | cor          | p                            | cor          | p            | cor             | p                            |
| EDSS                        | 0.11         | 0.39                         | -0.10        | 0.44                         | 0.11         | 0.40                         | -0.05        | 0.73                         | 0.05         | 0.68                         | -0.22        | 0.09                         | -0.11        | 0.42         | 0.09            | 0.51                         |
| Change in EDSS              | 0.05         | 0.69                         | -0.11        | 0.39                         | 0.07         | 0.61                         | -0.15        | 0.27                         | 0.03         | 0.83                         | -0.16        | 0.22                         | 0.01         | 0.91         | -0.01           | 0.96                         |
| MSSS                        | -0.04        | 0.73                         | -0.14        | 0.28                         | -0.04        | 0.79                         | -0.15        | 0.26                         | -0.09        | 0.48                         | <b>-0.27</b> | <b>0.039</b>                 | <b>-0.29</b> | <b>0.025</b> | 0.00            | 0.98                         |
| Change in MSSS              | -0.04        | 0.78                         | 0.02         | 0.86                         | 0.08         | 0.56                         | -0.20        | 0.13                         | -0.02        | 0.89                         | -0.04        | 0.78                         | 0.06         | 0.62         | -0.11           | 0.42                         |
| T25FWT                      | 0.12         | 0.35                         | -0.10        | 0.46                         | 0.14         | 0.28                         | -0.03        | 0.82                         | 0.01         | 0.95                         | -0.13        | 0.33                         | 0.03         | 0.84         | 0.18            | 0.17                         |
| Change in T25FWT            | 0.04         | 0.74                         | -0.03        | 0.84                         | 0.03         | 0.82                         | -0.19        | 0.15                         | 0.02         | 0.89                         | -0.02        | 0.85                         | 0.12         | 0.35         | 0.10            | 0.45                         |
| 9HPT Dominant               | 0.16         | 0.23                         | -0.17        | 0.19                         | 0.01         | 0.93                         | -0.10        | 0.46                         | -0.03        | 0.83                         | -0.25        | 0.055                        | -0.04        | 0.75         | 0.04            | 0.78                         |
| Change in 9HPT Dominant     | 0.05         | 0.70                         | -0.15        | 0.27                         | -0.01        | 0.93                         | -0.12        | 0.36                         | -0.07        | 0.58                         | -0.14        | 0.27                         | -0.10        | 0.43         | -0.01           | 0.95                         |
| 9HPT Non-dominant           | <b>0.36</b>  | <b>5.8 x 10<sup>-3</sup></b> | -0.11        | 0.42                         | 0.16         | 0.22                         | 0.03         | 0.80                         | 0.16         | 0.22                         | -0.22        | 0.10                         | 0.12         | 0.37         | <b>0.28</b>     | <b>0.030</b>                 |
| Change in 9HPT Non-dominant | <b>0.28</b>  | <b>0.035</b>                 | -0.19        | 0.14                         | 0.15         | 0.28                         | 0.05         | 0.68                         | 0.14         | 0.31                         | -0.09        | 0.50                         | 0.14         | 0.28         | 0.21            | 0.12                         |
| DMT Level                   | 0.01         | 0.93                         | -0.11        | 0.40                         | 0.01         | 0.93                         | 0.03         | 0.80                         | -0.05        | 0.70                         | 0.04         | 0.79                         | -0.01        | 0.93         | <b>0.26</b>     | <b>0.046</b>                 |
| Total attacks               | -0.20        | 0.13                         | -0.16        | 0.23                         | -0.05        | 0.70                         | -0.14        | 0.30                         | -0.16        | 0.21                         | 0.00         | 0.99                         | <b>-0.26</b> | <b>0.047</b> | 0.03            | 0.84                         |
| New attacks                 | -0.17        | 0.20                         | -0.23        | 0.08                         | -0.12        | 0.37                         | -0.20        | 0.13                         | -0.22        | 0.08                         | -0.03        | 0.81                         | -0.13        | 0.31         | 0.09            | 0.49                         |
| OCB status                  | -0.04        | 0.75                         | -0.03        | 0.83                         | -0.16        | 0.22                         | 0.00         | 0.98                         | -0.11        | 0.42                         | 0.03         | 0.82                         | -0.01        | 0.95         | -0.03           | 0.82                         |
| Gender                      | <b>-0.28</b> | <b>0.031</b>                 | -0.06        | 0.65                         | -0.21        | 0.11                         | 0.05         | 0.68                         | -0.18        | 0.17                         | <b>0.26</b>  | <b>0.046</b>                 | <b>-0.30</b> | <b>0.021</b> | -0.04           | 0.78                         |
| NEDA-3                      | -0.16        | 0.22                         | -0.01        | 0.94                         | -0.05        | 0.72                         | -0.13        | 0.31                         | -0.13        | 0.31                         | -0.11        | 0.39                         | -0.22        | 0.08         | -0.04           | 0.78                         |
| NEDA-4                      | -0.08        | 0.55                         | 0.00         | 0.99                         | 0.08         | 0.55                         | -0.05        | 0.72                         | -0.10        | 0.49                         | -0.11        | 0.41                         | -0.18        | 0.19         | 0.00            | 0.99                         |
| Distance from diagnosis     | -0.21        | 0.10                         | 0.04         | 0.78                         | 0.00         | 0.98                         | -0.15        | 0.25                         | -0.10        | 0.47                         | 0.01         | 0.95                         | -0.21        | 0.12         | -0.18           | 0.16                         |
| Distance from first symptom | 0.18         | 0.17                         | 0.01         | 0.92                         | 0.00         | 1.00                         | -0.05        | 0.69                         | 0.14         | 0.27                         | 0.01         | 0.92                         | 0.13         | 0.31         | 0.18            | 0.16                         |
| MRI variables               | cor          | p                            | cor          | p                            | cor          | p                            | cor          | p                            | cor          | p                            | cor          | p                            | cor          | p            | cor             | p                            |
| WMLL                        | <b>0.46</b>  | <b>3.0 x 10<sup>-4</sup></b> | 0.01         | 0.95                         | <b>0.30</b>  | <b>0.025</b>                 | 0.19         | 0.16                         | 0.24         | 0.07                         | 0.04         | 0.77                         | 0.23         | 0.08         | <b>0.38</b>     | <b>3.2 x 10<sup>-3</sup></b> |
| Change in WMLL              | <b>0.30</b>  | <b>0.022</b>                 | 0.02         | 0.89                         | <b>0.30</b>  | <b>0.025</b>                 | 0.12         | 0.34                         | 0.20         | 0.13                         | 0.06         | 0.64                         | 0.14         | 0.29         | <b>0.34</b>     | <b>9.6 x 10<sup>-3</sup></b> |
| Brain volume                | -0.25        | 0.06                         | <b>-0.38</b> | <b>3.2 x 10<sup>-3</sup></b> | <b>-0.32</b> | <b>0.016</b>                 | <b>-0.43</b> | <b>8.8 x 10<sup>-4</sup></b> | <b>-0.35</b> | <b>7.3 x 10<sup>-3</sup></b> | <b>-0.40</b> | <b>2.2 x 10<sup>-3</sup></b> | -0.05        | 0.70         | -0.24           | 0.07                         |
| Brain atrophy               | <b>-0.33</b> | <b>0.011</b>                 | -0.20        | 0.14                         | <b>-0.41</b> | <b>1.6 x 10<sup>-3</sup></b> | <b>-0.31</b> | <b>0.017</b>                 | <b>-0.37</b> | <b>4.7 x 10<sup>-3</sup></b> | <b>-0.28</b> | <b>0.032</b>                 | <b>-0.33</b> | <b>0.013</b> | -0.13           | 0.32                         |
| ICV                         | -0.01        | 0.94                         | <b>-0.31</b> | <b>0.019</b>                 | -0.22        | 0.09                         | <b>-0.29</b> | <b>0.027</b>                 | -0.20        | 0.13                         | <b>-0.29</b> | <b>0.027</b>                 | 0.02         | 0.86         | -0.02           | 0.87                         |

**Supplementary table 11.** Group characteristics based on the DMT level at time point 3, also taking into account retrospective DMT switches. DMT level is explained in the methods section. Three MS patients didn't fit these groups and were excluded in this table. Abbreviations: Expanded Disability Status Scale (EDSS), Timed 25 Feet Walk Test (T25FWT), Multiple Sclerosis Severity Score (MSSS), Fatigue Severity Score (FSS) and Beck Depression Index (BDI).

| Variables                                 | Disease-modifying therapies |                  |                   |
|-------------------------------------------|-----------------------------|------------------|-------------------|
|                                           | No treatment, n=21          | First line, n=30 | Second line, n=22 |
| Age MS Onset (SD)                         | 31.4 (6.6)                  | 29.0 (6.2)       | 27.6 (7.1)        |
| Female (%)                                | 15 (71)                     | 19 (63)          | 17 (77)           |
| EDSS time point 1(SD)                     | 2.3 (1.2)                   | 1.8 (0.8)        | 2.0 (0.7)         |
| EDSS time point 2(SD)                     | 2.4 (1.0)                   | 1.7 (0.9)        | 1.8 (0.7)         |
| EDSS time point 3 (SD)                    | 2.2 (1.6)                   | 2.1 (1.1)        | 1.7 (1.0)         |
| EDSS change (SD)                          | 0.03 (1.1)                  | 0.2 (0.8)        | -0.4 (0.9)        |
| Brain age gap time point 1 (SD)           | -2.8 (9.3)                  | -1.7 (8.3)       | -1.7 (9.3)        |
| Brain age gap time point 2 (SD)           | -1.4 (10.1)                 | -2.6 (7.5)       | -0.7 (10.1)       |
| Brain age gap time point 3 (SD)           | 0.2 (9.1)                   | -0.7 (9.6)       | 0.2 (10.3)        |
| Annual rate of brain aging (SD)           | 0.92 (0.82)                 | 0.13 (1.3)       | 0.35 (1.3)        |
| T25FWT time point 3, seconds (SD)         | 4.2 (1.9)                   | 3.9 (0.6)        | 4.0 (0.6)         |
| T25FWT change, seconds (SD)               | 0.2 (1.4)                   | 0.0 (1.1)        | 0.1 (0.5)         |
| MSSS Change (SD)                          | -1.8 (1.3)                  | -2.0 (1.7)       | -3.1 (2.1)        |
| Disease duration time point 3, years (SD) | 11.6 (5.7)                  | 11.2 (5.9)       | 8.7 (4.2)         |
